# Supplementary material
Source: PubMed Central journal article supplement (PMC7049966)
Supplement: supp_RA119.010626_155175_1_supp_437807_q20r9n.pdf [file supp_RA119.010626_155175_1_supp_437807_q20r9n.pdf]

## *Supplementary Material*

**Serum amyloid A exhibits pH dependent antibacterial action and contributes to host defense against *Staphylococcus aureus* cutaneous infection**

**Han Zheng, Haifeng Li, Jingyuan Zhang, Hanlu Fan, Lina Jia, Wenqiang Ma, Shuoqian Ma, Shenghong Wang, Hua You, Zhinan Yin, Xiangdong Li\***

**\* Correspondence: Xiangdong Li, E-mail: [xiangdongli@cau.edu.cn](mailto:xiangdongli@cau.edu.cn).**

**Supplemental table**

**Table S1.**

**Primers for *Saa1/2*, *Saa3*, *Il6* and *Gapdh*.**

|               | <b>Forward Primer</b>         | <b>Reverse Primer</b>          |
|---------------|-------------------------------|--------------------------------|
| <i>Saa1/2</i> | 5'-AGTGGCAAAGACCCCAATTA-3'    | 5'-GGCAGTCCAGGAGGTCTGTA-3'     |
| <i>Saa3</i>   | 5'-CGCAGCACGAGCAGGAT-3'       | 5'-CCAGGATCAAGATGCAAAGAATG-3'  |
| <i>Gapdh</i>  | 5'-AGGTCGGTGTGAACGGATTTG-3'   | 5'-TGTAGACCATGTAGTTGAGGTCA-3'. |
| <i>Il6</i>    | 5'-TAGTCCTTCCTACCCCAATTTCC-3' | 5'-TTGGTCCTTAGCCACTCCTTC-3'    |

## Supplementary Figure

Fig. S1.

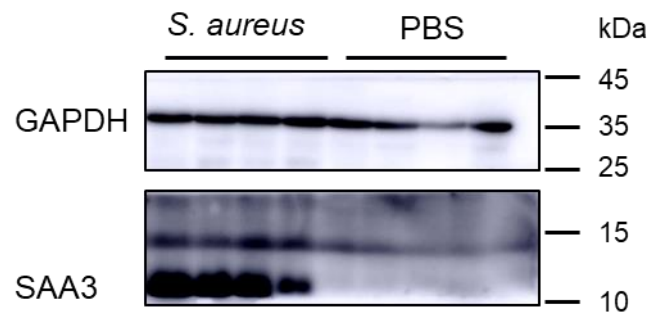

Fig. S1.

Western blot detection of SAA3 in *S. aureus*-infected wild-type mice cutaneous lesion. Mice were subcutaneously infected for 3 day.

**Fig. S2.**

**A**

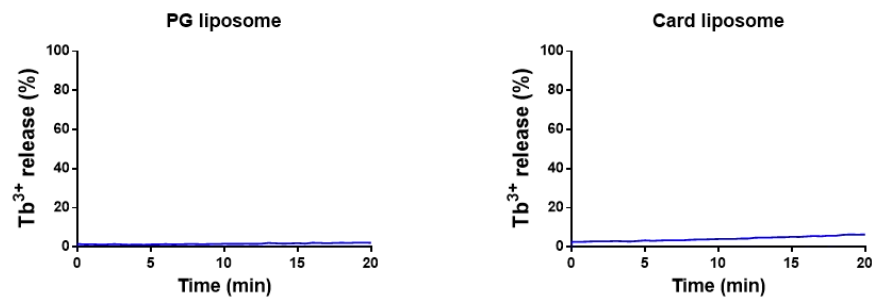

**B**

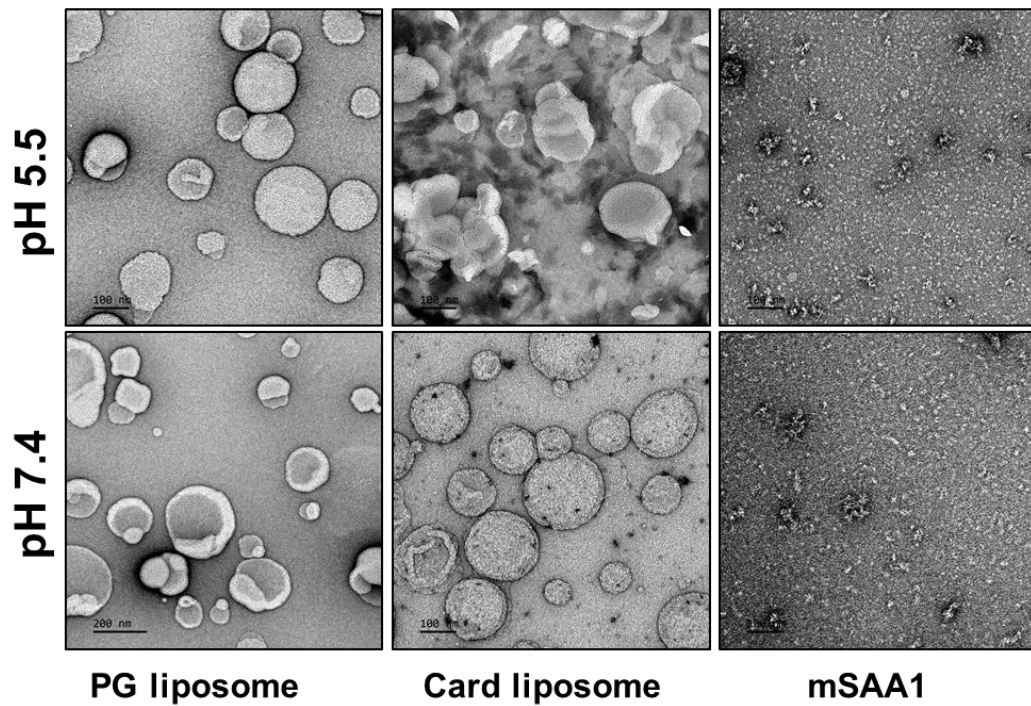

**Fig. S2.**

A.  $Tb^{3+}$  releasing of PG and Cardiolipin liposome with buffer alone at pH 5.5. B. PG liposomes (left), cardiolipin liposomes (middle) and mSAA1 proteins (right) with buffer alone at pH 7.4 (Bottom) or pH 5.5 (Top) at 37 °C.
